# Supplementary material
Source: PubMed Central journal article supplement (PMC2951192)
Supplement: supp_M110.107805_supplemental.pdf [file supp_M110.107805_supplemental.pdf]

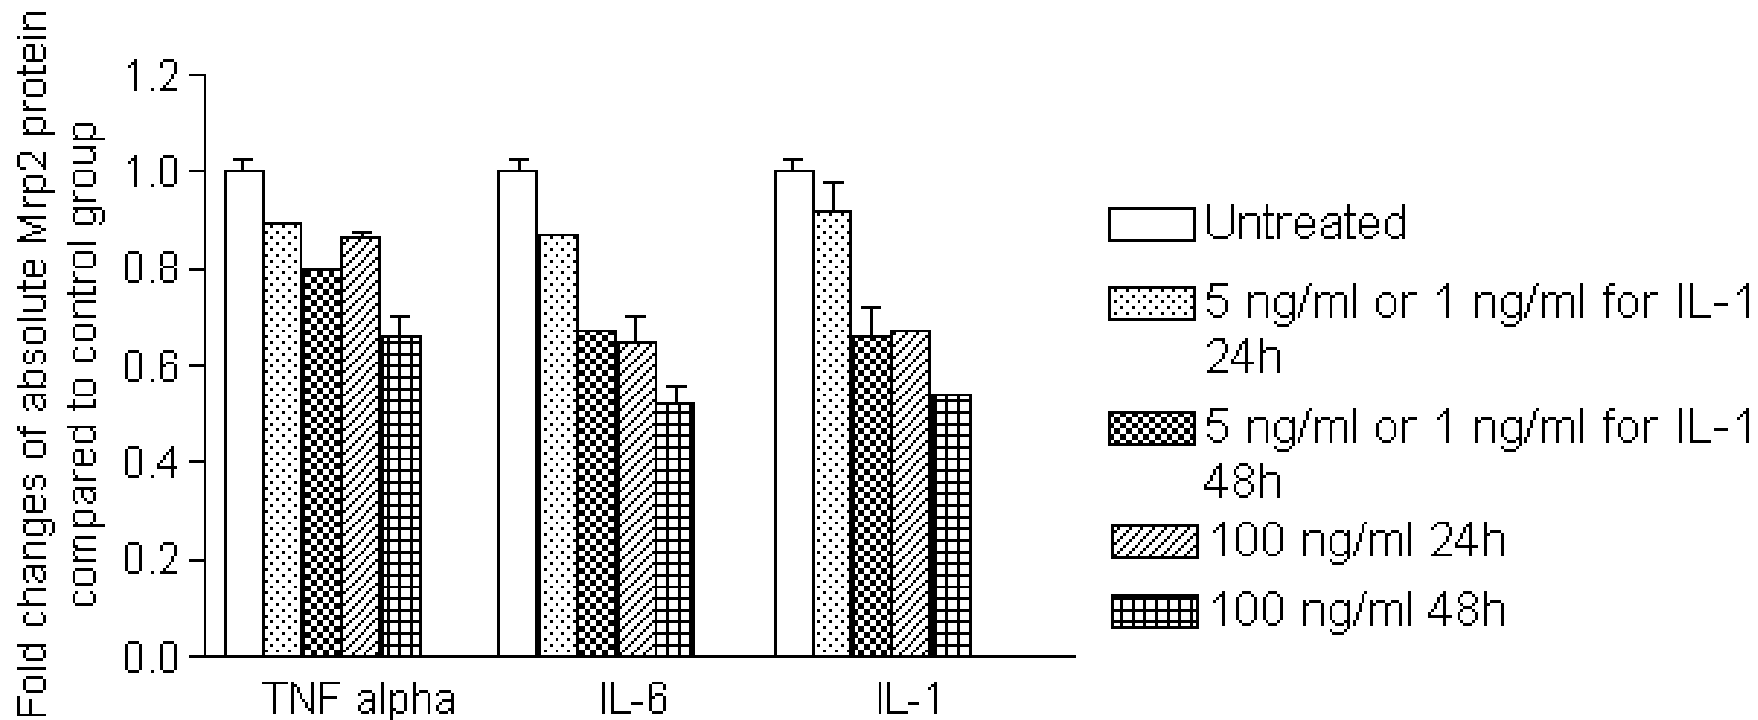

Figure S1. **Changes of MRP2/ABCC2 protein expression in SC human hepatocytes exposed to TNF- $\alpha$ , IL-6 and IL-1 $\beta$  (dose dependency).** The membrane protein fraction was prepared from SC human hepatocytes from 1-3 wells of a 24-well plate, and was subjected to LC-MS/MS SRM analysis for absolute quantification of MRP2/ABCC2. The data represents the mean  $\pm$  S.D (n=3).

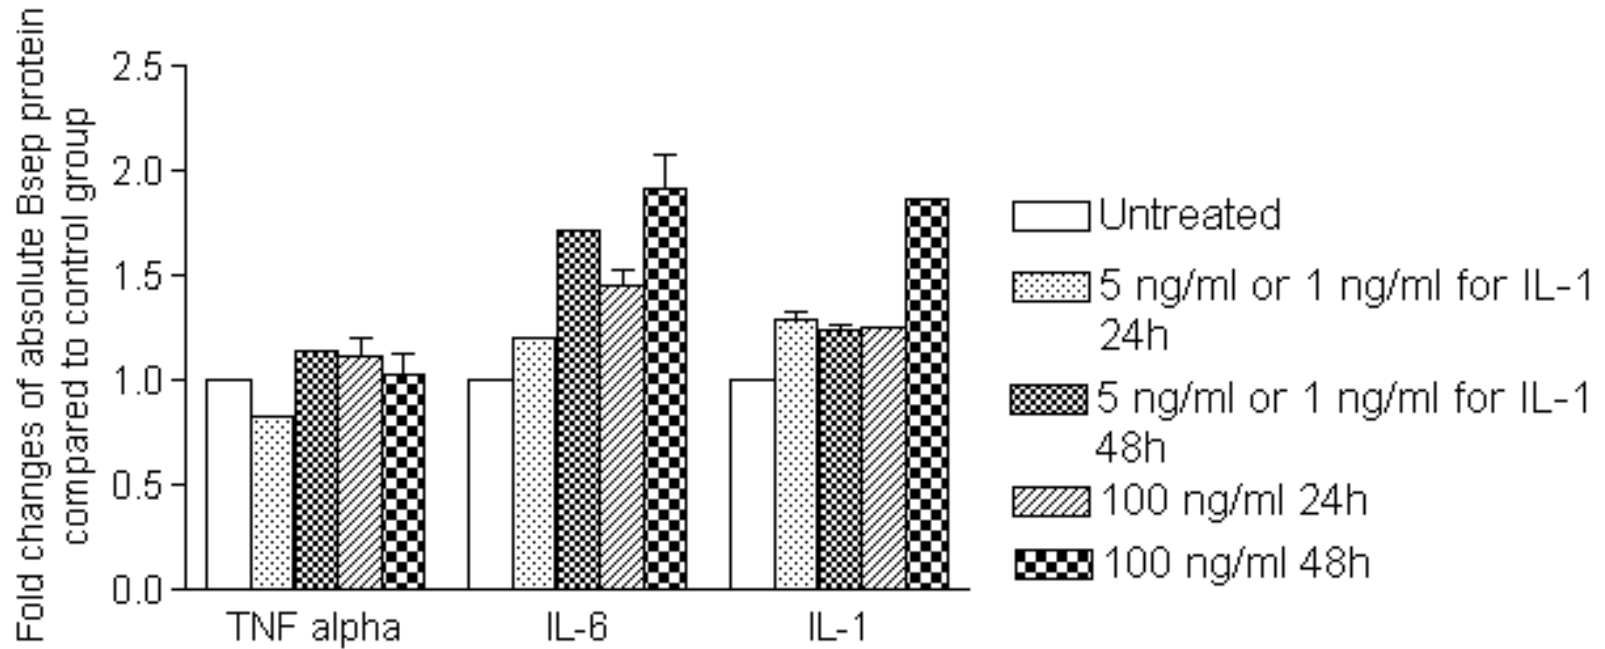

Figure S2 . ***Changes of BSEP/ABCB11 protein expression in SC human hepatocytes exposed to TNF- $\alpha$ , IL-6 and IL-1 $\beta$  (dose dependency).*** The membrane protein fraction was prepared from SC human hepatocytes from 1-3 wells of a 24-well plate, and was subjected to LC-MS/MS SRM analysis for absolute quantification of BSEP/ABCB11 protein. The data represents the mean  $\pm$  S.D (n=3)

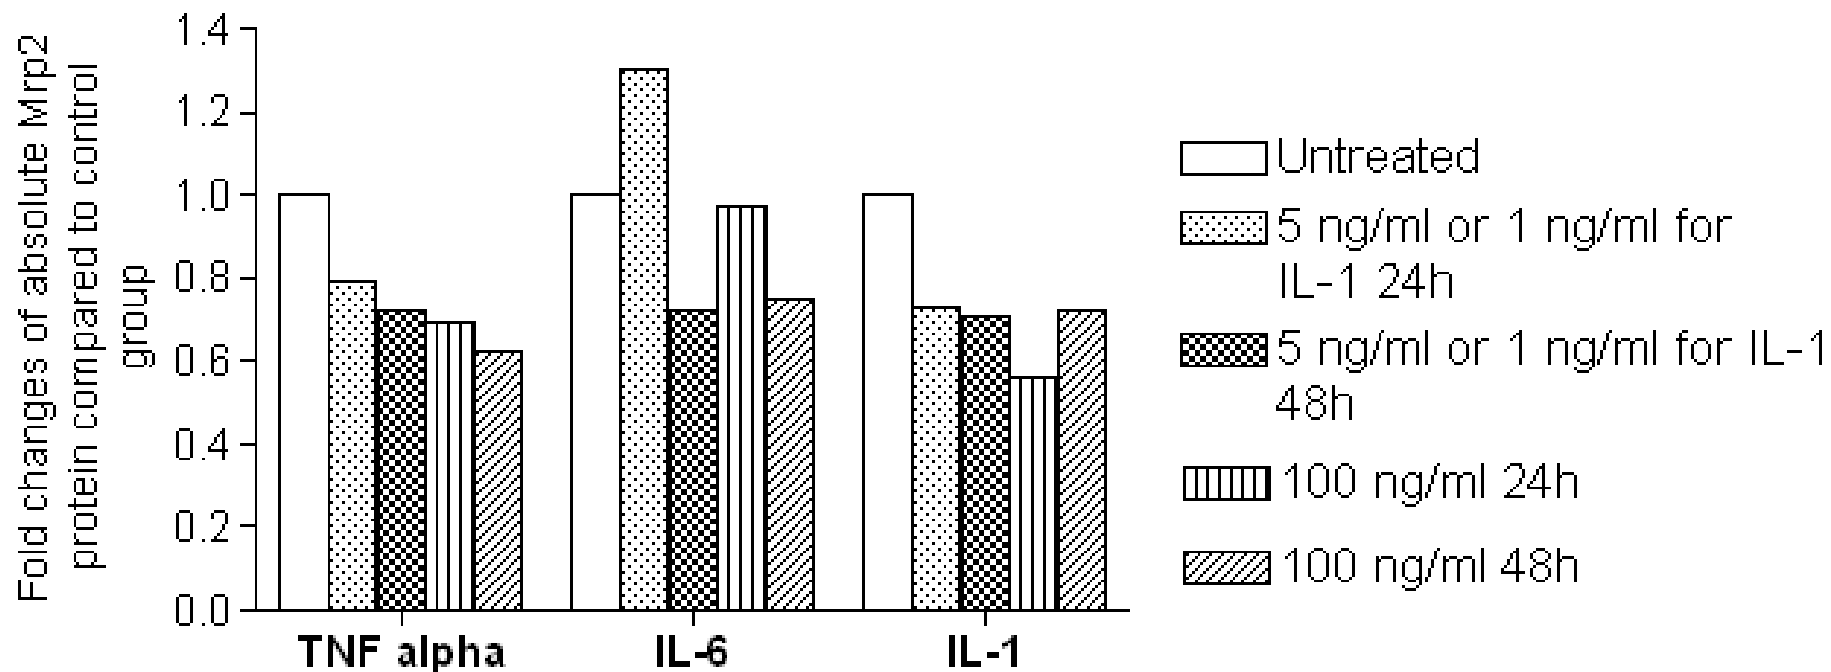

Figure S3. **Changes of MRP2/ABCC2 protein expression in HepG2 cells exposed to TNF- $\alpha$ , IL-6 and IL-1 $\beta$  (dose dependency).** The membrane protein fraction was prepared from HepG2 cells, and was subjected to LC-MS/MS SRM analysis for absolute quantification of MRP2/ABCC2.
